# Supplementary material for: Exosomes Derived from Gold Nanorod Engineered Vascular Endothelial Cells Inhibit Tumor Growth via Disrupting the TGFβ Pathway
Source: Hindawi journal article supplement (doi:10.1155/2022/2042754), 2022-01-01
Supplement: f1 [file 2042754.f1.docx]

Supporting Information

Exosomes derived from gold nanorods engineered vascular endothelial cells inhibit tumor growth via disrupting TGFβ pathway

Weiye Zhu1, Rui Zhang1, Zichang Zhao1, Na Zhao1, Xiao Gui1, Xiao Cui1, Ni Shen1, Jiawei Zhao1, Guangping Gao1, Haorui Zhang1, Chenyang Huan1, Yukun Zhou1, Yanjie Li1, Jianhua Zhang1, Hongyuan Song1，2, Wei Shen1

1Department of Ophthalmology, Shanghai Changhai Hospital, Naval Medical University, Shanghai 200433, China.

2Department of Ophthalmology, Shanghai General Hospital, Shanghai Jiao Tong University School of Medicine, Shanghai, 200080, China.

Correspondence should be addressed to Jianhua Zhang; drzhangjianhua@163.com, Hongyuan Song; hongyuansong@hotmail.com and Wei Shen; shenwzz@163.com


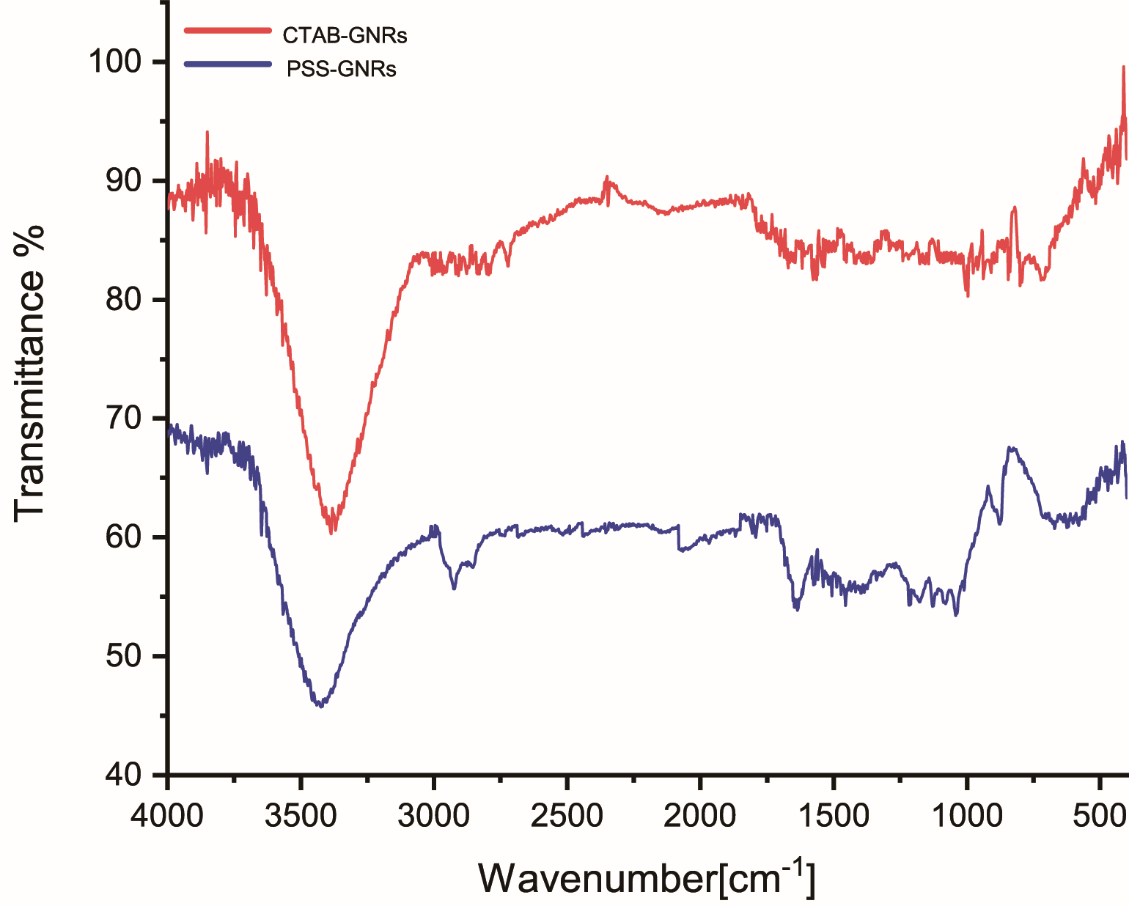


**Figure S1.** FT-IR spectrum of gold nanorods. PSS-GNRs showed a remarkable band at 1215 cm-1,1176 cm-1 and 1124 cm-1.


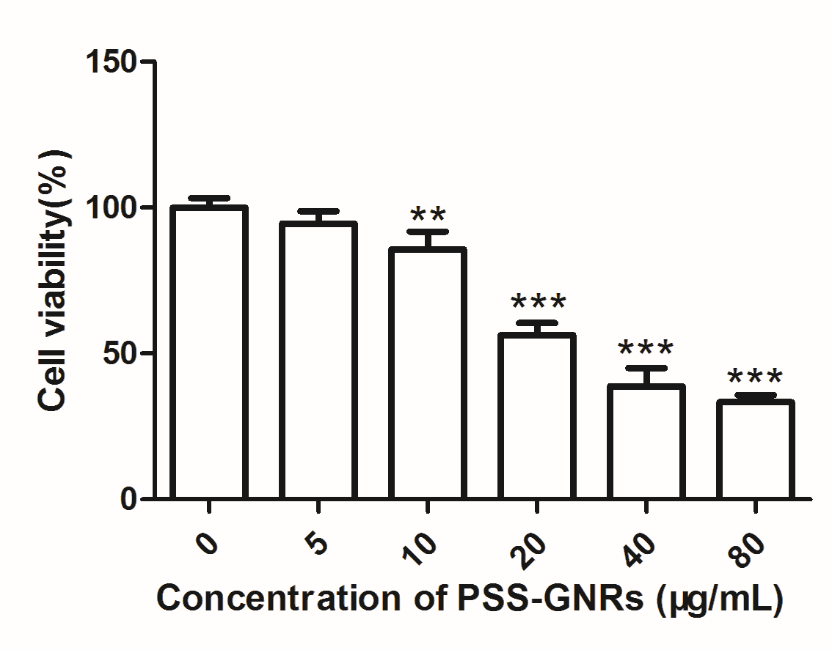


**Figure S2.** Cell viability of PSS-GNRs treated HREC. Data are presented as the means ± SD, n=3 (***p*<0.01; ****p*<0.001).


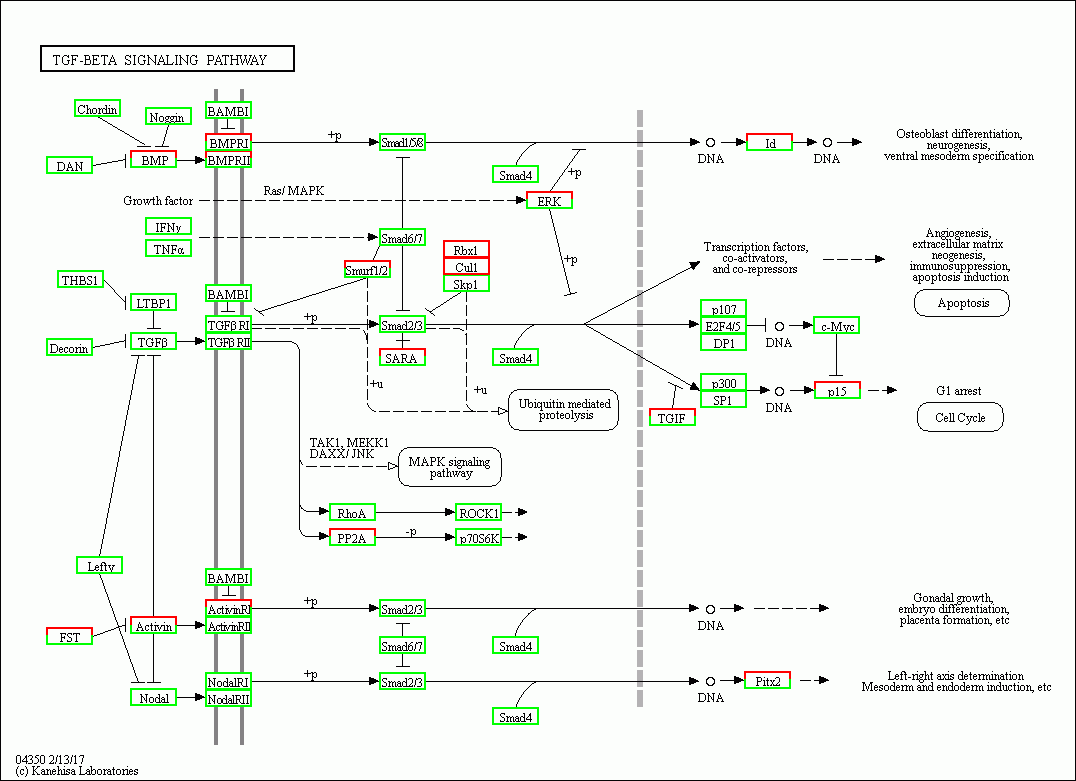


**Figure S3.** Gene sequencing data showed that miRNAs in GNRs-Exo could disrupt TGFβ pathway compared with exosomes in control group.

**Table S1.** Primers used for miRNA quantification.

| miRNAs | Primers |
| --- | --- |
| hsa-miR-378b | 5’ACTGGACTTGGAGGCAGAA3‘ |
| hsa-miR-483-5p | 5’AAGACGGGAGGAAAGAAGGGAG3‘ |
| hsa-miR-500a-3p | 5’ATGCACCTGGGCAAGGATTCTG3‘ |
| hsa-miR-10b-3p | 5’ACAGATTCGATTCTAGGGGAAT3‘ |
| hsa-miR-363-3p | 5’AATTGCACGGTATCCATCTGTA3‘ |
| hsa-miR-103a-2-5p | 5’AGCTTCTTTACAGTGCTGCCTTG3‘ |
| hsa-miR-597-3p | 5’TGGTTCTCTTGTGGCTCAAGCGT3‘ |
| hsa-miR-490-5p | 5’CCATGGATCTCCAGGTGGGT3‘ |
| hsa-miR-4417 | 5’GGTGGGCTTCCCGGAGGG3‘ |
| hsa-miR-204-3p | 5’GCTGGGAAGGCAAAGGGACGT3‘ |

**Table S2.** Ct value for miRNA quantification.

| miRNAs | Ct value (control exosome) | Ct value (GNRs-Exo) |
| --- | --- | --- |
| hsa-miR-378b | 32.91639328 | 30.33948898 |
| hsa-miR-483-5p | 32.93143082 | 30.99190521 |
| hsa-miR-500a-3p | 27.96586227 | 26.22166443 |
| hsa-miR-10b-3p | 38.93118286 | 35.38482742 |
| hsa-miR-363-3p | 36.94402695 | 34.80598068 |
| hsa-miR-103a-2-5p | 31.91407776 | 29.08928299 |
| hsa-miR-597-3p | 33.92873383 | 31.56739578 |
| hsa-miR-490-5p | 37.92290497 | 32.84320602 |
| hsa-miR-4417 | 38.92717361 | 37.31213303 |
| hsa-miR-204-3p | 35.91910172 | 32.03905182 |
| U6 (control) | 27.33359528 | 27.92048073 |
